# Supplementary material for: Self-powered, ultra-broadband, and polarization-sensitive photodetectors based on 1D van der Waals layered material Nb2Pd3Se8
Source: Royal Society of Chemistry journal article supplement (doi:10.1039/d3ta01223a), 2023-01-01
Supplement: d3ta01223a1.pdf [file d3ta01223a1.pdf]

# Supporting Information

## Self-powered, ultra-broadband, and polarization-sensitive photodetectors based on 1D van der Waals layered material

### $\text{Nb}_2\text{Pd}_3\text{Se}_8$

Qinggong Qin,<sup>a</sup> Wenshuai Gao,<sup>\*a</sup> Hanlin Zhang,<sup>a</sup> Jiawang Chen,<sup>b</sup> Yong Yan,<sup>c</sup> Kejia Zhu,<sup>d</sup> Mingsheng Long,<sup>a</sup> Gang Li,<sup>a</sup> Shiqi Yin,<sup>a</sup> Yuchen Du,<sup>a</sup> Hui Zhang,<sup>a</sup> Qilong Wang,<sup>a</sup> Zihan Wang,<sup>a</sup> Ying Li,<sup>a</sup> Shaotian Wang,<sup>a</sup> and Liang Li<sup>\*ab</sup>

<sup>a</sup>Institutes of Physical Science and Information Technology, Anhui University, Hefei 230601, P. R. China

<sup>b</sup>Key Laboratory of Materials Physics, Anhui Key Laboratory of Nanomaterials and Nanotechnology, Institute of Solid State Physics, Hefei Institutes of Physical Science, Chinese Academy of Sciences, Hefei 230031, P.R. China, University of Science and Technology of China, Hefei 230026, P.R. China

<sup>c</sup>School of Physics, Henan Key Laboratory of Photovoltaic Materials, Henan Normal University, Xinxiang, Henan 453007, P.R. China

<sup>d</sup>School of Physics and Optoelectronics Engineering, Anhui University, Hefei 230601, China

\*Corresponding author (liliang@issp.ac.cn)

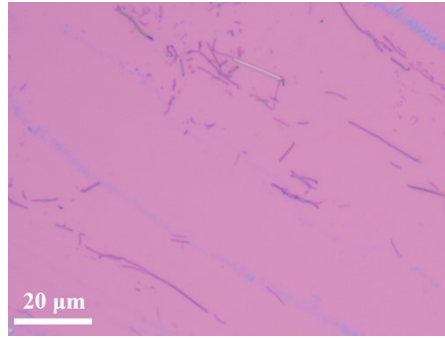

**Figure S1.** Optical image of the exfoliated Nb<sub>2</sub>Pd<sub>3</sub>Se<sub>8</sub> nanowires.

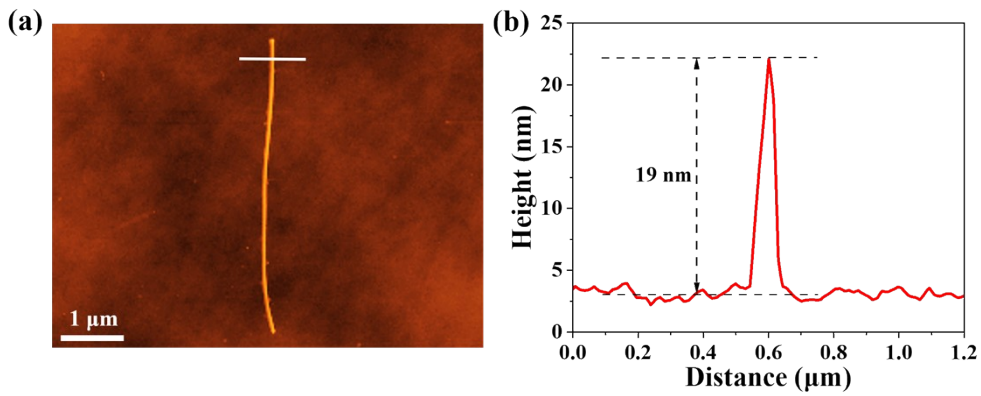

**Figure S2.** (a) AFM image of exfoliated Nb<sub>2</sub>Pd<sub>3</sub>Se<sub>8</sub> nanowire. b) Height profiles corresponding to the line in (a).

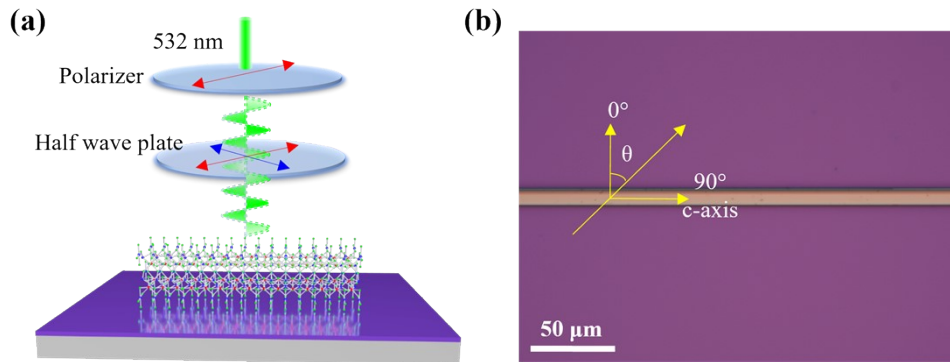

**Figure S3.** (a) Schematic diagram of the experimental setup for the polarized Raman test. (b) Optical image of the bulk Nb<sub>2</sub>Pd<sub>3</sub>Se<sub>8</sub>.

From a semi-classical perspective, the Raman intensity of Nb<sub>2</sub>Pd<sub>3</sub>Se<sub>8</sub> can be identified by:

$$I \propto |e_i \cdot R \cdot e_s|^2 \quad S(1)$$

where  $e_i$  and  $e_s$  are the unit polarization vectors of incident and scattered lasers, respectively, and  $R$  is the Raman tensor. The unit polarization vector is  $e_i = (\cos \theta, 0, \sin \theta)$ , where  $\theta$  is the angle between incident light polarization and a axis direction of the Nb<sub>2</sub>Pd<sub>3</sub>Se<sub>8</sub>. And  $e_s = (\cos \theta, 0, \sin \theta)$  and  $e_s = (-\sin \theta, 0, \cos \theta)$  correspond to  $e_s$  in parallel and perpendicular configurations, respectively. For an absorptive material, the

Raman tensor elements are complex values, with real and imaginary parts.<sup>1</sup> Bulk  $\text{Nb}_2\text{Pd}_3\text{Se}_8$  belongs to the Pbam space group. Thus, the Raman tensor can be expressed as

$$\begin{aligned} \mathbf{R}(A_g) &= \begin{pmatrix} |a|e^{i\varphi_a} & 0 & 0 \\ 0 & |b|e^{i\varphi_b} & 0 \\ 0 & 0 & |c|e^{i\varphi_c} \end{pmatrix} & \mathbf{R}(B_{1g}) &= \begin{pmatrix} 0 & |d|e^{i\varphi_d} & 0 \\ |d|e^{i\varphi_d} & 0 & 0 \\ 0 & 0 & 0 \end{pmatrix} \\ \mathbf{R}(B_{2g}) &= \begin{pmatrix} 0 & 0 & |e|e^{i\varphi_e} \\ 0 & 0 & 0 \\ |e|e^{i\varphi_e} & 0 & 0 \end{pmatrix} & \mathbf{R}(B_{3g}) &= \begin{pmatrix} 0 & 0 & 0 \\ 0 & 0 & |f|e^{i\varphi_f} \\ 0 & |f|e^{i\varphi_f} & 0 \end{pmatrix} \end{aligned} \quad \text{S(2)}$$

where  $\varphi_a$ ,  $\varphi_b$ ,  $\varphi_c$ ,  $\varphi_d$ ,  $\varphi_e$ , and  $\varphi_f$  are the corresponding phases of the Raman tensor elements.<sup>2</sup> Then, the Raman scattering intensities of different modes can further be expressed as

$$I(A_g, //) \propto |c|^2 \left\{ \left( \sin^2\theta + \frac{|a|^2}{|c|^2} \cos\varphi_{ca} \cos^2\theta \right)^2 + \left( \frac{|a|}{|c|} \sin\varphi_{ca} \cos^2\theta \right)^2 \right\} \quad \text{S(3)}$$

$$I(B_{2g}, //) \propto |e|^2 \sin^2 2\theta \quad \text{S(4)}$$

where  $//$  represents parallel polarizations, and  $\varphi_{ca} = \varphi_c - \varphi_a$  is the phase difference. It can be seen that the calculated curves fitted well with the experimental data in Figure 2f.

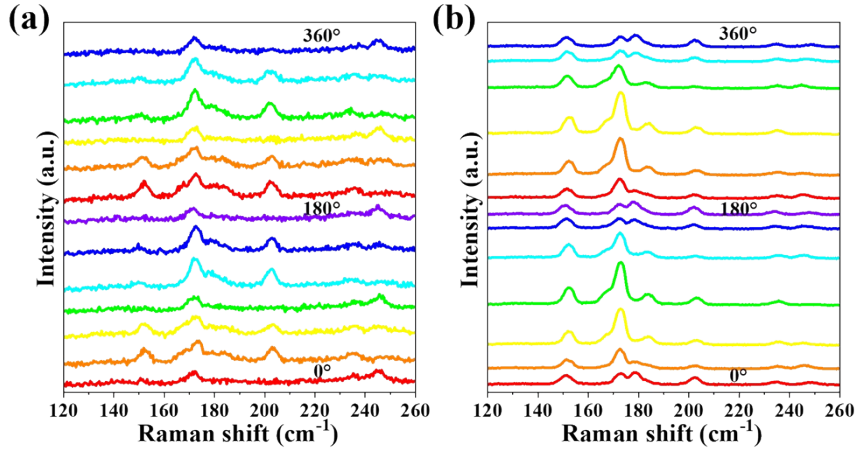

**Figure S4.** Angle-resolved polarized Raman spectra acquired in the (a) parallel configuration and (d) perpendicular configuration.

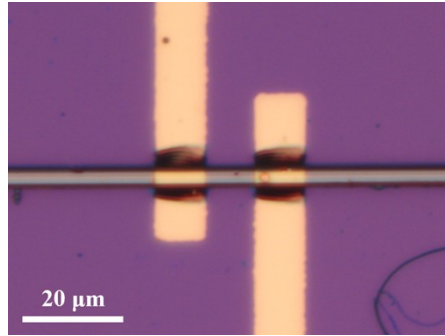

**Figure S5.** Optical image of the Nb<sub>2</sub>Pd<sub>3</sub>Se<sub>8</sub> device.

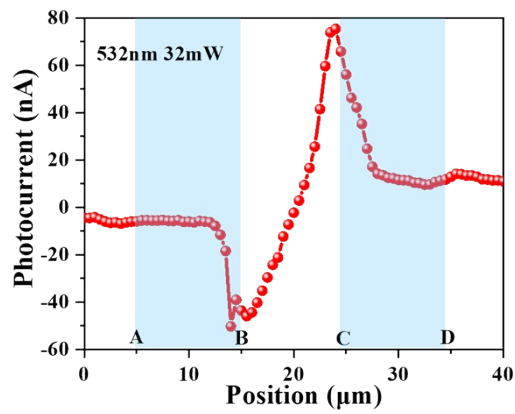

**Figure S6.** Photocurrent response of the Nb<sub>2</sub>Pd<sub>3</sub>Se<sub>8</sub> device along a line cut in Figure 4b. The blue portions represent the Au electrodes of the device.

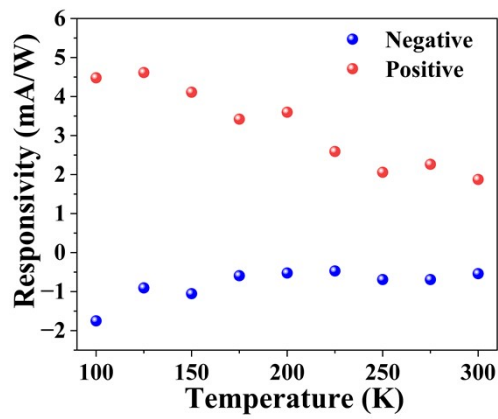

**Figure S7.** The responsivity of the Nb<sub>2</sub>Pd<sub>3</sub>Se<sub>8</sub> photodetector under different temperatures.

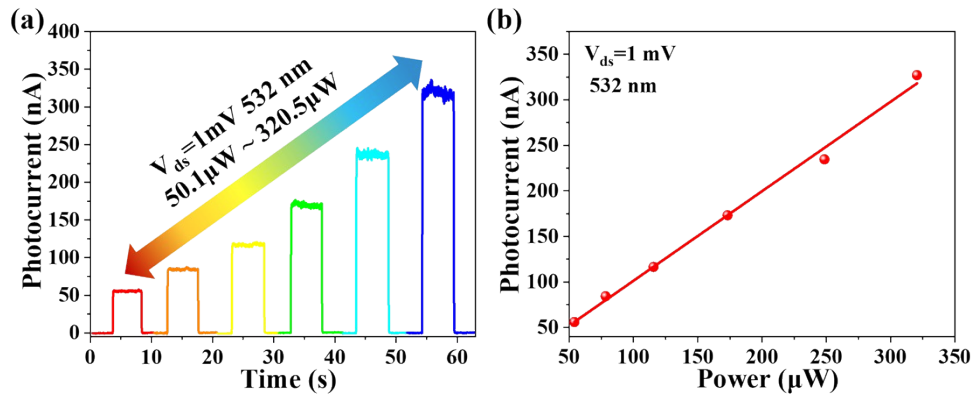

**Figure S8.** (a) Photoresponse of the  $\text{Nb}_2\text{Pd}_3\text{Se}_8$  photodetector with a bias of 1 mA to different light intensities under 532 nm light illumination. (b) A good linear relationship between photoresponse and light intensities in the experimental range.

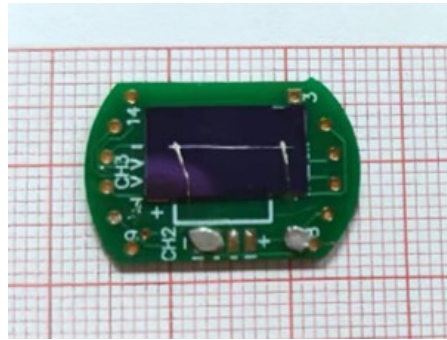

**Figure S9.** Optical image of the  $\text{Nb}_2\text{Pd}_3\text{Se}_8$  device for broadband detection.

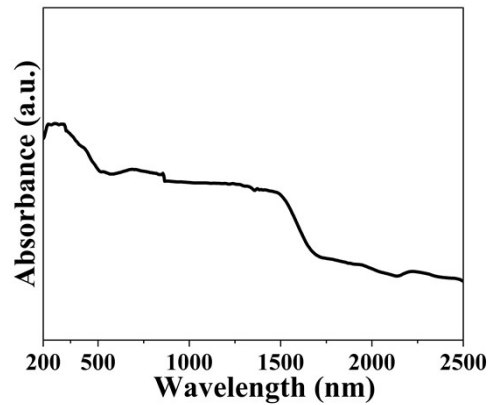

**Figure S10.** Absorption spectrum of the  $\text{Nb}_2\text{Pd}_3\text{Se}_8$ .

**Table S1.** Comparison of Photodetectors Reported in the Literature.

| Materials                                       | Responsivity            | Response time    | Polarization extinction ratio | Spectral Range ( $\mu\text{m}$ ) | Ref.      |
|-------------------------------------------------|-------------------------|------------------|-------------------------------|----------------------------------|-----------|
| PtTe <sub>2</sub>                               | 0.04 mA W <sup>-1</sup> | 34 $\mu\text{s}$ | 1.11 (633 nm)                 | 0.532-4                          | 3         |
| NdSb <sub>2</sub>                               | 0.49 mA W <sup>-1</sup> | 15 $\mu\text{s}$ | 1.6 (532 nm)                  | 0.532-4                          | 4         |
| MoTe <sub>2</sub>                               | 0.4 mA W <sup>-1</sup>  | 43 $\mu\text{s}$ | 1.19 (633 nm)                 | 0.532-10.6                       | 5         |
| TaIrTe <sub>4</sub>                             | 0.02 mA W <sup>-1</sup> | 27 $\mu\text{s}$ | 1.13 (633 nm)                 | 0.532–10.6                       | 6         |
| Cd <sub>3</sub> As <sub>2</sub>                 | 5.9 mA W <sup>-1</sup>  | 6.9 ps           | —                             | 0.532-10.6                       | 7         |
| Nb <sub>2</sub> Pd <sub>3</sub> Se <sub>8</sub> | 2.74 mA W <sup>-1</sup> | 55 ms            | 1.42 (532 nm)                 | 0.365-10.6                       | This work |

## REFERENCES

1. H. B. Ribeiro, M. A. Pimenta, C. J. de Matos, R. L. Moreira, A. S. Rodin, J. D. Zapata, E. A. de Souza and A. H. Castro Neto, *ACS Nano*, 2015, **9**, 4270-4276.
2. X. Ling, S. Huang, E. H. Hasdeo, L. Liang, W. M. Parkin, Y. Tatsumi, A. R. Nugraha, A. A. Puretzky, P. M. Das, B. G. Sumpter, D. B. Geohegan, J. Kong, R. Saito, M. Drndic, V. Meunier and M. S. Dresselhaus, *Nano Lett.*, 2016, **16**, 2260-2267.
3. J. W. Lai, J. C. Ma, Y. N. Liu, K. N. Zhang, X. Zhuo, J. H. Chen, S. Y. Zhou and D. Sun, *2D Mater.*, 2020, **7**, 034003.
4. G. Li, H. L. Zhang, Y. Li, S. Q. Yin, X. C. Kan, W. S. Wei, H. F. Du, B. H. Ge, C. An, M. L. Tian, F. Yan, S. J. Yang, T. Y. Zhai and L. Li, *Nano Res.*, 2022, **15**, 5469-5475.
5. J. Lai, X. Liu, J. Ma, Q. Wang, K. Zhang, X. Ren, Y. Liu, Q. Gu, X. Zhuo, W. Lu, Y. Wu, Y. Li, J. Feng, S. Zhou, J. H. Chen and D. Sun, *Adv. Mater.*, 2018, **30**, e1707152.
6. J. Lai, Y. Liu, J. Ma, X. Zhuo, Y. Peng, W. Lu, Z. Liu, J. Chen and D. Sun, *ACS Nano*, 2018, **12**, 4055-4061.
7. Q. Wang, C. Z. Li, S. Ge, J. G. Li, W. Lu, J. Lai, X. Liu, J. Ma, D. P. Yu, Z. M. Liao and D. Sun, *Nano Lett.*, 2017, **17**, 834-841.
